# Supplementary material for: Synthesis, structure, photocatalytic and magnetic properties of an oxo-bridged copper dimer
Source: Royal Society of Chemistry journal article supplement (doi:10.1039/c4ra01886a), 2014-01-01
Supplement: c4ra01886a1.pdf [file c4ra01886a1.pdf]

## *Supporting Information*

### **Synthesis, Structure, Photocatalytic and Magnetic Properties of an Oxo-bridged Copper Dimer**

*Raja Ghosh,<sup>a</sup> Asha K S,<sup>a</sup> Saied Md Pratib,<sup>b</sup> Ayan Datta,<sup>b</sup> Ramesh Nath,<sup>c</sup> Sukhendu Mandal<sup>\*a</sup>*

<sup>a</sup>School of Chemistry, Indian Institute of Science Education and Research Thiruvananthapuram,  
Thiruvananthapuram-695016, Kerala, INDIA

E-mail: [sukhendu@iisertvm.ac.in](mailto:sukhendu@iisertvm.ac.in)

<sup>b</sup>Department of Spectroscopy, Indian Association for the Cultivation of Science, Kolkata-  
700032, West Bengal, INDIA.

<sup>c</sup>School of Physics, Indian Institute of Science Education and Research Thiruvananthapuram,  
Thiruvananthapuram-695016, Kerala, INDIA

Table S1. Crystal data and structure refinement parameters of compound **1**.<sup>[a]</sup>

|                                               |                                                                 |
|-----------------------------------------------|-----------------------------------------------------------------|
| Empirical formula                             | C <sub>8</sub> H <sub>14</sub> N <sub>6</sub> O <sub>8</sub> Cu |
| Formula weight                                | 385.77                                                          |
| Crystal system                                | Orthorhombic                                                    |
| Space group                                   | <i>Pbca</i> (No. 61)                                            |
| Crystal size                                  | 0.20 x 0.15 x 0.15                                              |
| <i>a</i>                                      | 11.6890 (3) Å                                                   |
| <i>b</i>                                      | 14.7288(4) Å                                                    |
| <i>c</i>                                      | 17.9191(5) Å                                                    |
| $\alpha$                                      | 90.000                                                          |
| $\beta$                                       | 90.000                                                          |
| $\gamma$                                      | 90.000                                                          |
| Volume                                        | 3085.04(2) Å <sup>3</sup>                                       |
| <i>Z</i>                                      | 8                                                               |
| $\rho_{\text{calcd}}$ (gcm <sup>-3</sup> )    | 1.661                                                           |
| $\mu$ (mm <sup>-1</sup> )                     | 1.467                                                           |
| $\theta$ range (deg)                          | 2.86 to 30.50                                                   |
| reflection collected                          | 19348                                                           |
| unique reflections                            | 4657                                                            |
| number of parameters                          | 211                                                             |
| Goodness of fit                               | 1.053                                                           |
| R index [ <i>I</i> > 2 $\sigma$ ( <i>I</i> )] | R <sub>1</sub> = 0.0370, wR <sub>2</sub> = 0.1157               |
| R indices (all data)                          | R <sub>1</sub> = 0.0538, wR <sub>2</sub> = 0.1290               |
| largest diff. peak and hole e Å <sup>-3</sup> | 0.843 and -0.350                                                |

<sup>[a]</sup>  $R_1 = \Sigma||F_0| - |F_c|| / \Sigma|F_0|$ ;  $wR_2 = \{[w(F_0^2 - F_c^2)^2] / [w(F_0^2)^2]\}^{1/2}$ ;  
 $w = 1/[\sigma^2(F_0)^2 + (aP)^2 + bP]$ ;  $P = [\max(F_0^2, 0) + 2(F_c)^2]/3$ ,  
 where  $a = 0.0798$  and  $b = 0.7863$  for **1**, respectively.

Table S2. Characteristic IR bands of compound **1**.

| <b>IR BANDS</b>               | <b>Compound 1</b>     |
|-------------------------------|-----------------------|
| $\nu_S$ (H <sub>2</sub> O)    | 3415 cm <sup>-1</sup> |
| $\nu_S$ (N – H)               | 3139 cm <sup>-1</sup> |
| $\nu_S$ (C – H)asym           | 2990 cm <sup>-1</sup> |
| $\nu_S$ (C – H)sym            | 2813 cm <sup>-1</sup> |
| $\delta_S$ (H <sub>2</sub> O) | 1645 cm <sup>-1</sup> |
| $\nu_S$ (C =O)                | 1685 cm <sup>-1</sup> |
| $\delta_S$ (N-H)              | 1566 cm <sup>-1</sup> |
| $\delta_S$ (C-H)              | 1431 cm <sup>-1</sup> |
| $\nu_S$ (C – N)               | 1288 cm <sup>-1</sup> |
| $\nu_S$ (C-O)                 | 1245 cm <sup>-1</sup> |

Table S3: Selected bond distances and angles in compound 1<sup>a</sup>.

| <b>Bond</b>        | <b>Distance (Å)</b> |
|--------------------|---------------------|
| Cu(1)-O(2)         | 1.9101(14) [0.535]  |
| Cu(1)-O(1)#1       | 1.9195(13) [0.522]  |
| Cu(1)-O(1)         | 1.9296(13) [0.508]  |
| Cu(1)-O(3)         | 1.9310(15) [0.506]  |
| Cu(1) - O(7)       | 2.6262(13) [0.077]  |
| <b>Σ (Cu – O)</b>  | <b>[2.12]</b>       |
| O(1)-C(1)          | 1.416(2)            |
| O(6)-C(4)          | 1.254(2)            |
| O(5)-C(3)          | 1.233(2)            |
| C(1)-C(2)          | 1.534(3)            |
| C(1)-C(6)#1        | 1.535(3)            |
| C(1)-C(4)          | 1.547(3)            |
| O(4)-C(5)          | 1.234(3)            |
| O(3)-C(5)          | 1.289(2)            |
| O(2)-C(3)          | 1.284(2)            |
| C(6)-C(5)          | 1.515(3)            |
| C(6)-C(1)#1        | 1.535(3)            |
| C(4)-O(7)          | 1.252(2)            |
| C(4)-O(7)          | 1.252(2)            |
| C(4)-O(7)          | 1.252(2)            |
| C(2)-C(3)          | 1.542(3)            |
| <b>Moiety</b>      | <b>Angle ( )</b>    |
| Cu(1)#1-O(1)-Cu(1) | 95.36(6)            |

<sup>a</sup> Values in brackets are the bond valences. Their sum SVB appears in bold type at the end of the list of the distances around copper atom. Symmetry transformations used to generate equivalent atoms: #1 -x,-y,-z+1

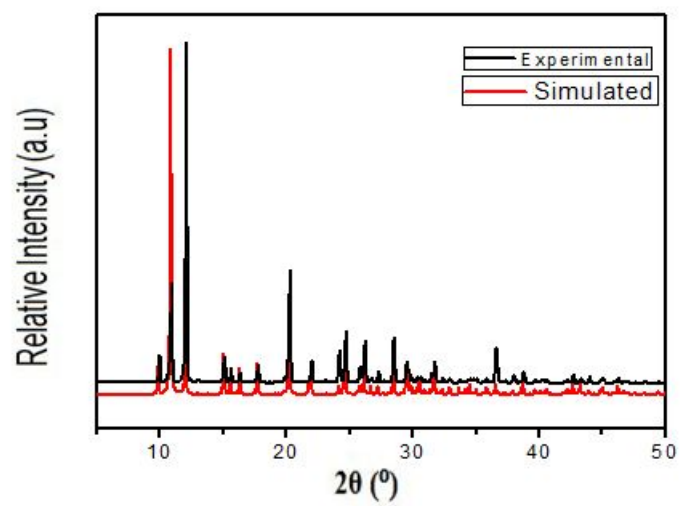

**Figure S1.** The experimental and simulated XRD pattern of **1**.

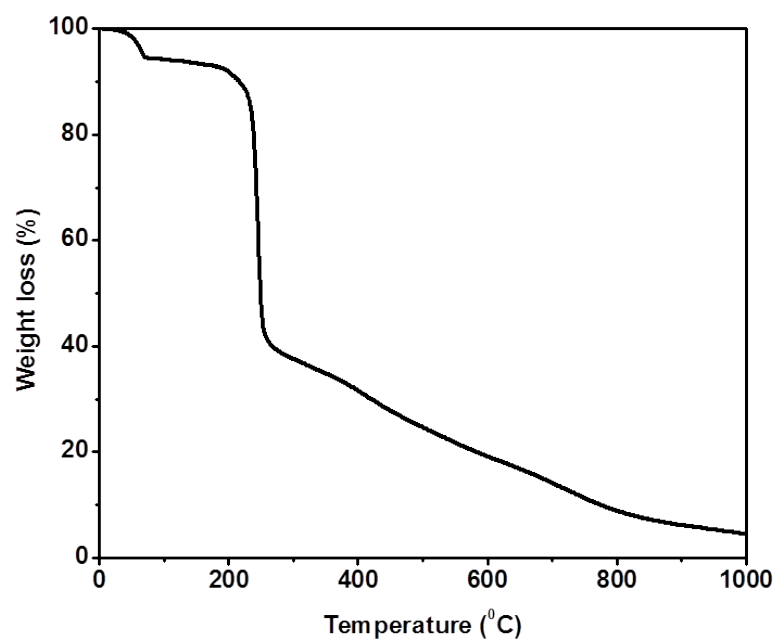

**Figure S2.** Thermogravimetric Analysis (TGA) plot of **1**.

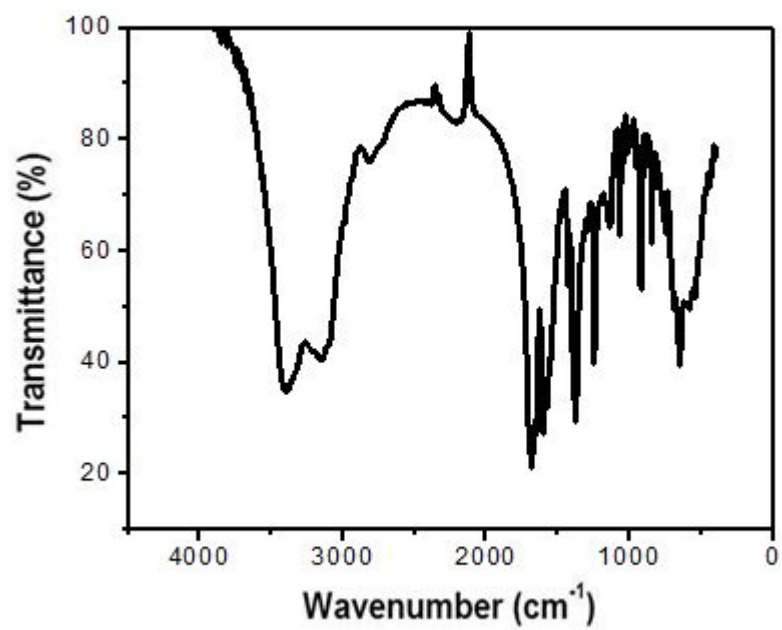

**Figure S3.** Characteristic IR peaks of compound 1.

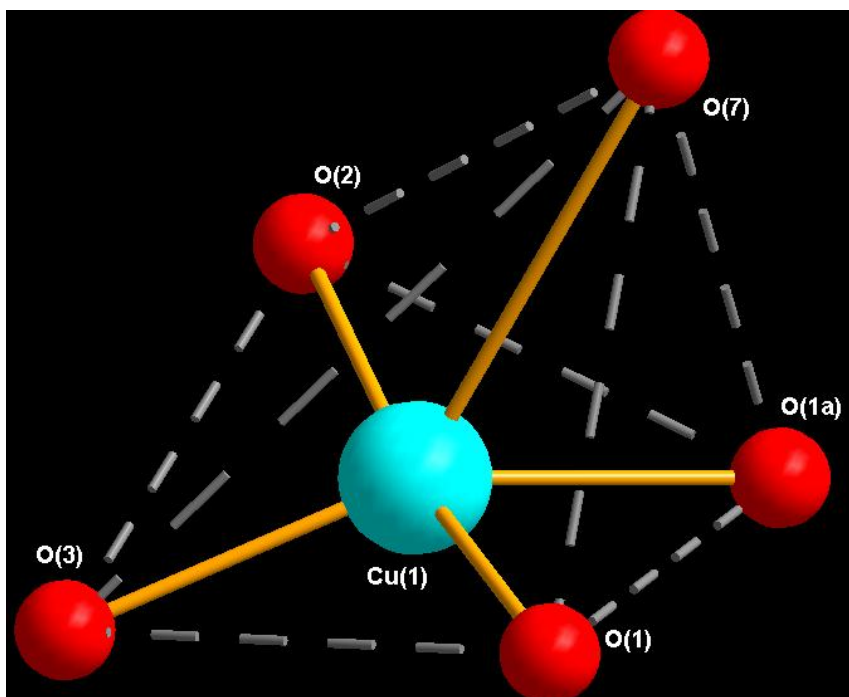

**Figure S4.** Distorted-square-pyramidal geometry of copper atom in **1**.



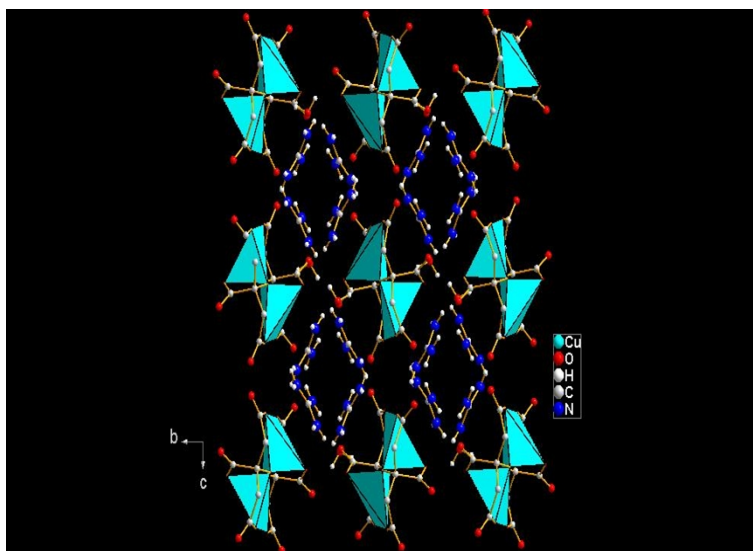

(a)

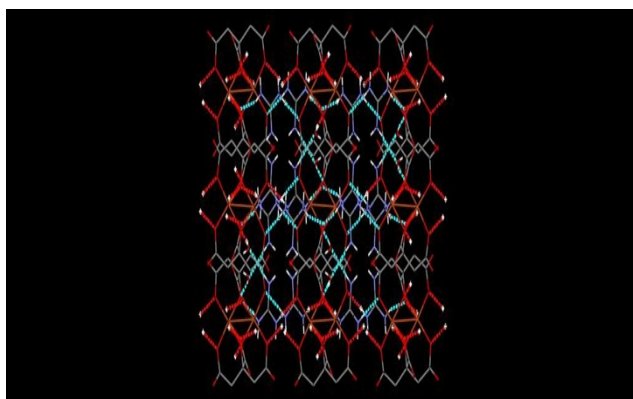

(b)

**Figure S5.** (a) Arrangement of the cluster units, protonated guanidine molecules and water molecules in *bc* plane in compound **1**. (b) H-bonded network in **1**.

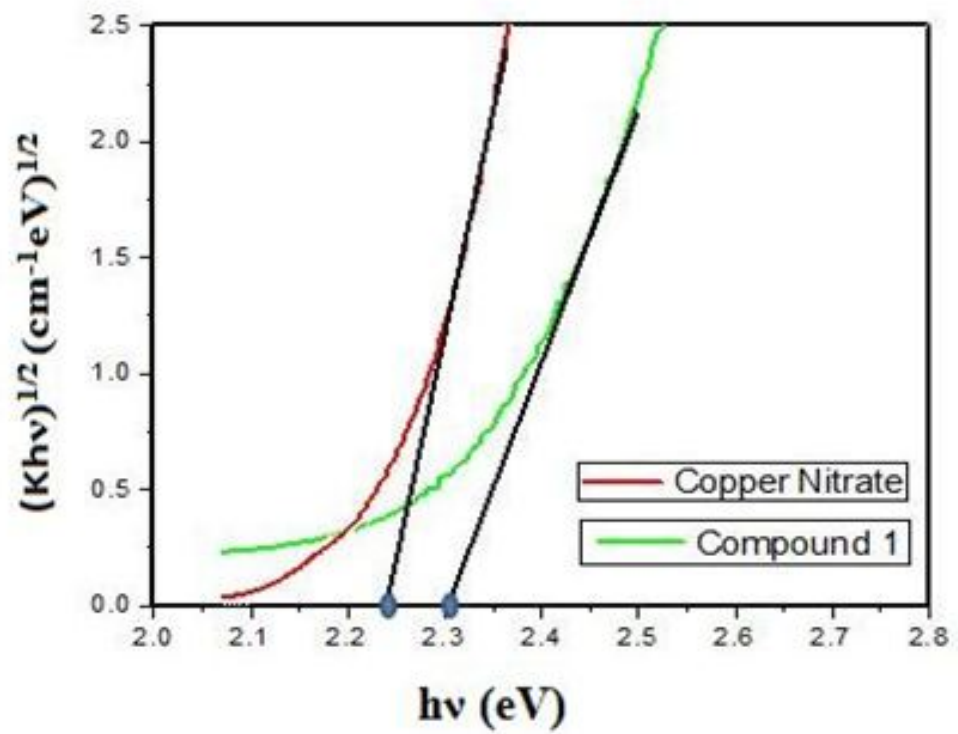

**Figure S6.** Diffuse reflectance UV-vis-NIR spectra of K–M functions vs. energy (eV) of **1** and metal precursor,  $\text{Cu}(\text{NO}_3)_2 \cdot 2.5\text{H}_2\text{O}$ .

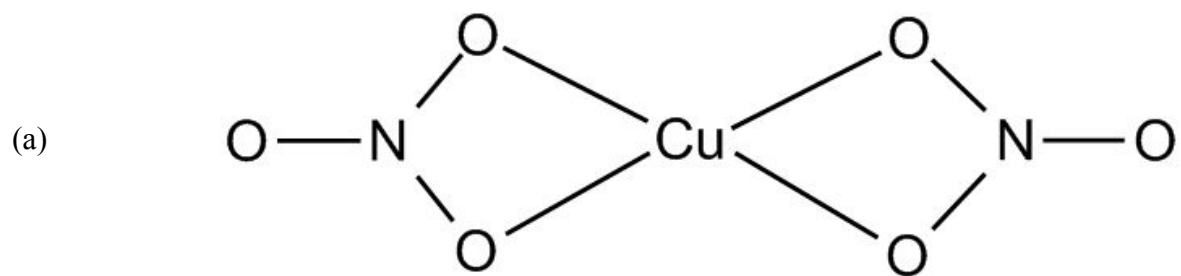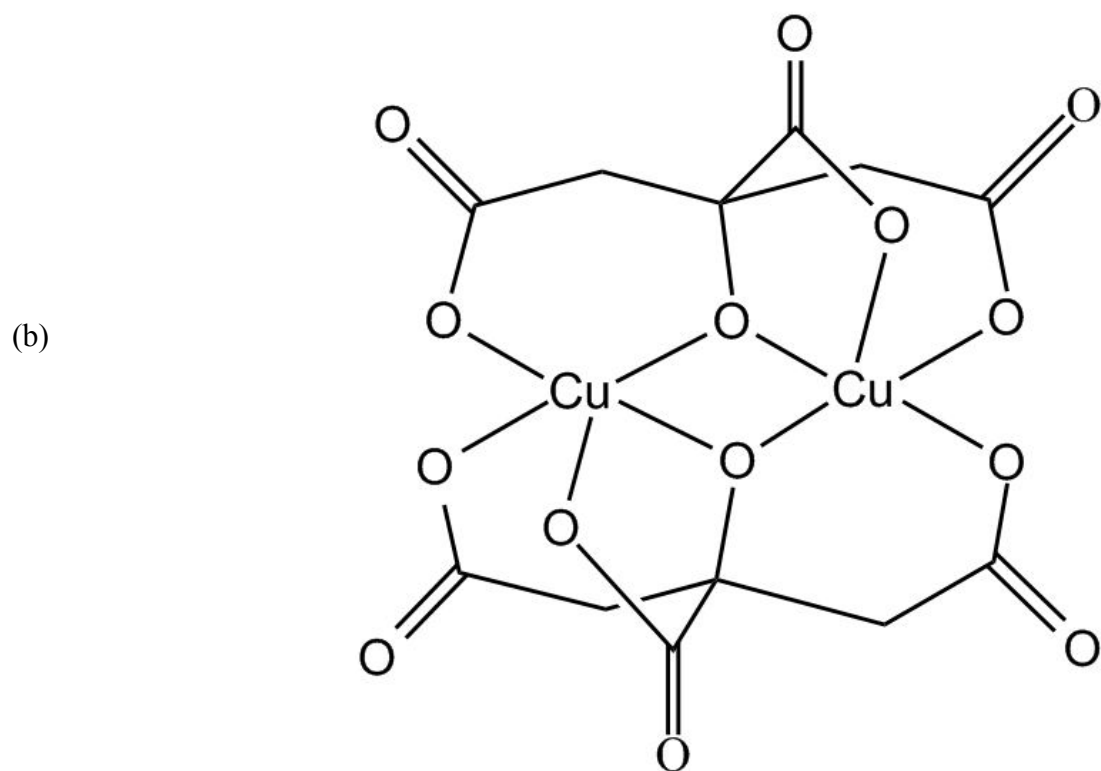

**Figure S7.** Binding mode of Cu atom with (a) nitrate anion in  $\text{Cu}(\text{NO}_3)_2$  and (b) citrate anions in compound **1**.

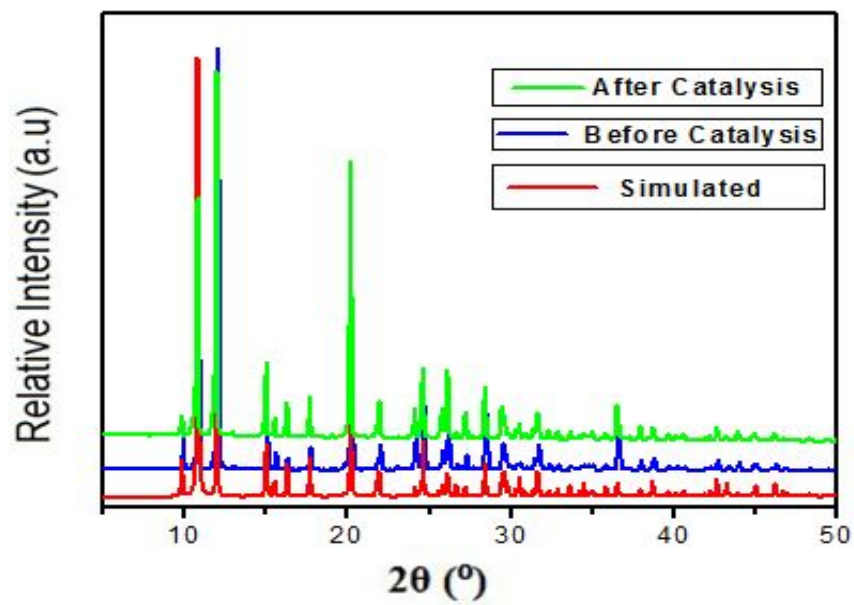

**Figure S8.** The PXRD patterns of compound **1** before and after photocatalysis.

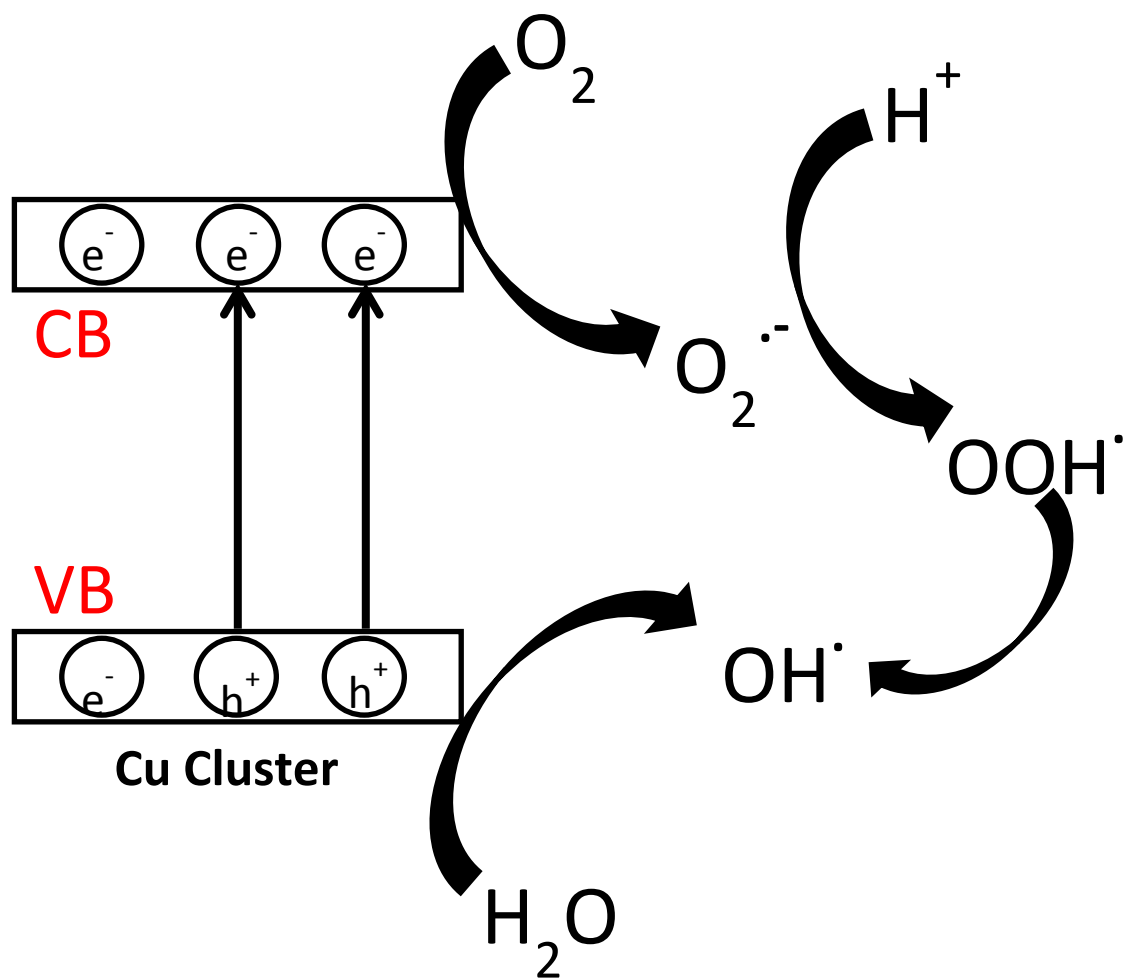

Scheme 1. Schematic diagram of the photocatalytic mechanism of **1**.
